# Supplementary material
Source: Elsevier journal article supplement (https://www.sciencedirect.com/science/article/pii/S2531043718300424)
Supplement: mmc2 [file S2531043718300424:mmc2.docx]

**Ocular tuberculosis – a closer look to an increasing reality**

**Authors and affiliations**

**Teixeira-Lopes, Fa; Alfarroba, Sb; Dinis, Ac; Gomes, MCd; Tavares Ae**

**a:** Chest Department, Centro Hospitalar Lisboa Norte, Lisboa, Portugal. [franciscateixeiralopes@gmail.com](mailto:franciscateixeiralopes@gmail.com)

**b**: Pulmonology Department, Centro Hospitalar de Lisboa Central, Lisboa, Portugal. [sara.alfa@netcabo.pt](mailto:sara.alfa@netcabo.pt)

**c:** Public Health Department, Regional Health Administration of Lisbon and Tagus Valley, Lisboa, Portugal. [ana.dinis@arslvt.min-saude.pt](mailto:ana.dinis@arslvt.min-saude.pt)

**d:** Dr. Ribeiro Sanches´s Pulmonology Diagnosis Center, Regional Health Administration of Lisbon and Tagus Valley, Lisboa, Portugal. Public Health Department, Regional Health Administration of Lisbon and Tagus Valley, Lisboa, Portugal. [gomes.mariadaconceicao@gmail.com](mailto:gomes.mariadaconceicao@gmail.com)

e: Public Health Department, Regional Health Administration of Lisbon and Tagus Valley, Lisboa, Portugal. [antonio.tavares@arslvt.min-saude.pt](mailto:antonio.tavares@arslvt.min-saude.pt)

**Corresponding author**: Francisca Teixeira Lopes, Avenida Professor Egas Moniz, 1649-035 Lisbon, Portugal. Fax: 217 548 215; Phone: 917926296; email: [franciscateixeiralopes@gmail.com](mailto:franciscateixeiralopes@gmail.com)
